# Supplementary material for: Real-world effectiveness of caplacizumab vs the standard of care in immune thrombotic thrombocytopenic purpura
Source: PubMed Central journal article supplement — Blood Adv. 2022 Aug 9;6(24):6219–27. doi: 10.1182/bloodadvances.2022008028 (PMC9792393; doi:10.1182/bloodadvances.2022008028), 2022-08-09
Supplement: BLOODA_ADV-2022-008028-mmc1.pdf [file BLOODA_ADV-2022-008028-mmc1.pdf]

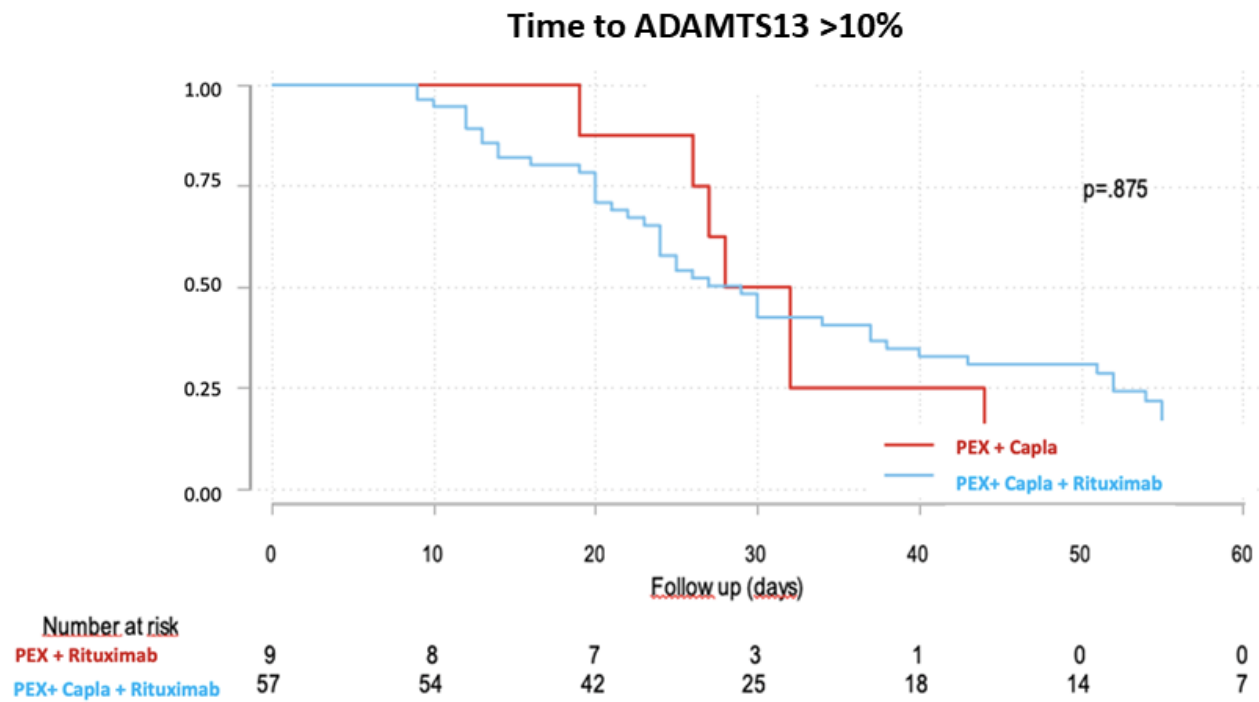

**Supplementary Figure 1.** Survival analysis. Time to ADAMTS13 >10% in patients treated with caplacizumab, with or without rituximab (n=66\*). (It should be noted that all patients also received PEX and corticosteroids). \*Missing values

**Supplementary Table 1.** Characteristics of the 8 patients who died during an acute episode†

| Treated with caplacizumab | Patient number | Age (years) / Sex | Neurologic involvement    | Cardiologic involvement  | LDH ratio (patient/normal range) | Platelets (x 10 <sup>9</sup> /L) at first PEX | Time from first symptom to first PEX | Time from diagnosis to 1st PEX | Time from 1st PEX to death | Day from first PEX to 1st dose of caplacizumab | Clinical course and treatment                                                                                                | Ultimate cause of death                     |
|---------------------------|----------------|-------------------|---------------------------|--------------------------|----------------------------------|-----------------------------------------------|--------------------------------------|--------------------------------|----------------------------|------------------------------------------------|------------------------------------------------------------------------------------------------------------------------------|---------------------------------------------|
| NO                        | 92             | 54 / Male         | Yes (Coma)                | No                       | x 6                              | 8                                             | UK                                   | 0                              | <1 day                     | NA                                             | Was only treated with 1 PEX procedure.                                                                                       | Brain death                                 |
| NO                        | 98             | 29 / Male         | Yes (Seizures)            | No                       | x 3.5                            | 7                                             | UK                                   | 1                              | 12 hours                   | NA                                             | Hospitalized with Status Epilepticus. Was only treated with 1 PEX procedure.                                                 | Refractory Status Epilepticus               |
| NO                        | 101            | 56 / Female       | Yes (Low conscious level) | No                       | X 8                              | 5                                             | 3                                    | 0                              | 10 days                    | NA                                             | Progression to coma. Refractory to PEX, corticosteroids, N-acetyl cysteine and rituximab (day 1).                            | Hypovolemic shock due to digestive bleeding |
| NO                        | 141            | 58 / Female       | Yes (Headache)            | No                       | X 3                              | 5                                             | 3                                    | 0                              | 10 days                    | NA                                             | Progression to myopericarditis and cerebellar ischemic stroke. Refractory to PEX and rituximab day 1 (2 doses).              | Cardiogenic shock                           |
| NO                        | 148            | 37 / Female       | Yes (Seizures)            | Yes (NSTEMI)             | X 2                              | 25                                            | UK                                   | 0                              | 12 hours                   | NA                                             | Only 1 PEX procedure.                                                                                                        | Cardiogenic shock                           |
| NO                        | 153            | 36 / Male         | Yes (Coma)                | No                       | X 3.5                            | 16                                            | 4                                    | 0                              | 12 hours                   | NA                                             | Only 1 PEX procedure.                                                                                                        | Multiorgan failure                          |
| YES                       | 70             | 43 / Female       | Yes (Seizures)            | Yes (troponin elevation) | x 5                              | 9                                             | 4                                    | 0                              | 5 days                     | 1                                              | Refractory TTP treatment: rituximab day 1 after PE 375 mg/m <sup>2</sup> /week. (1 dose), caplacizumab 10 mg/day, daily PEX. | Multiorgan failure. Intracranial bleeding   |
| YES                       | 74             | 61 / Male         | Yes (Seizures)            | Yes (troponin elevation) | x 12                             | 7                                             | 3                                    | 0                              | 10 days                    | 1                                              | Multifactorial encephalopathy. Refractory TTP to PEX, rituximab day 1 (2 doses), caplacizumab.                               | Multiorgan failure                          |

† All patients were treated with corticosteroids as of the first day after PE

LDH: Lactate dehydrogenase; NA: not available; NSTEMI: non-ST-elevation myocardial infarction; PEX: plasma exchange; TTP: Thrombotic Thrombocytopenic Purpura; UK: Unknown.

**Supplementary Table 2.** Time to platelet normalization ( $>150 \times 10^9/L$ ) in patients treated with caplacizumab as initial treatment

| <b>Caplacizumab as initial treatment</b> | <b>Time in days</b><br>Mean $\pm$ SD<br>Median (IQR) | <b>p-value</b> |
|------------------------------------------|------------------------------------------------------|----------------|
| 0-3 days<br>(N=30)                       | 6.93 $\pm$ 11.5<br>4 (3-5)                           | <b>0.003</b>   |
| 4-6 days<br>(N=9)                        | 12.2 $\pm$ 20.0<br>5 (5-9)                           |                |
| $\geq 7$ days<br>(N=4)                   | 18.3 $\pm$ 13.8<br>14.5 (10-26.5)                    |                |

IQR: interquartile range; SD: standard deviation

31 (70%) patients received caplacizumab at 0-3 days (1 was missing for time to platelet normalization), 9 (20%) at 4-6 days and 4 (9%) at 7 or more days from diagnosis

**Supplementary Table 3.** Multivariate analysis of factors related to length of hospitalization and number of plasma exchanges

| <b>Factors related to length of hospitalization</b> | <b>Coefficient</b> | <b>SE</b> | <b>t</b> | <b>p&gt; t </b> | <b>95%CI</b>  |
|-----------------------------------------------------|--------------------|-----------|----------|-----------------|---------------|
| Constant                                            | 25.94              | 6.90      | 3.76     | <b>0.000</b>    | 12.03;39.85   |
| Age                                                 | 0.14               | 0.11      | 1.24     | 0.218           | -0.08; 0.36   |
| Platelets $\geq 10$                                 | -4.29              | 2.93      | -1.46    | 0.148           | -10.11; 1.55  |
| Hemoglobin $\geq 8$                                 | -7.51              | 2.85      | -2.63    | <b>0.010</b>    | -13.17; -1.84 |
| LDH $\geq 1000$                                     | 2.50               | 2.45      | 1.02     | 0.310           | -2.36; 7.35   |
| Cardiovascular manifestations                       | -2.89              | 2.97      | -0.97    | 0.334           | -8.78; 3.01   |
| Neurological manifestations                         | -7.01              | 2.95      | -2.38    | <b>0.019</b>    | -12.86; -1.17 |
| Caplacizumab within 0-3 days                        | -11.22             | 2.83      | -3.96    | <b>0.000</b>    | -16.87; -5.58 |
| Rituximab                                           | 4.97               | 2.81      | 1.77     | 0.081           | -0.62; 10.56  |
| <b>Factors related to number of PEX</b>             | <b>Coefficient</b> | <b>SE</b> | <b>t</b> | <b>p&gt; t </b> | <b>95%CI</b>  |
| Constant                                            | 13.39              | 5.51      | 2.43     | <b>0.017</b>    | 2.48; 24.29   |
| Age                                                 | 0.20               | 0.09      | 2.23     | <b>0.027</b>    | 0.023; 0.38   |
| Platelets $\geq 10$                                 | -3.25              | 2.67      | -1.22    | 0.226           | -8.53; 2.03   |
| Hemoglobin $\geq 8$                                 | -3.02              | 2.58      | -1.17    | 0.244           | -8.12; 2.09   |
| LDH $\geq 1000$                                     | 1.44               | 2.17      | 0.66     | 0.508           | -2.85; 5.74   |
| Cardiovascular manifestations                       | -3.07              | 2.77      | -1.11    | 0.270           | -8.57; 2.43   |
| Neurological manifestations                         | -6.74              | 2.82      | -2.39    | <b>0.018</b>    | -12.30; -1.17 |
| Caplacizumab within 0-3 days                        | -7.49              | 2.63      | -2.84    | <b>0.005</b>    | -12.71; -2.27 |
| Rituximab                                           | 5.93               | 2.61      | 2.27     | <b>0.025</b>    | 0.77; 11.10   |

CI: confidence interval; LDH: lactate dehydrogenase; PEX: plasma exchanges; SE: standard error.

**Supplementary Table 4.** Number of iTTP patients treated with caplacizumab with adverse events

|                               | <b>iTTP patients<br/>treated with<br/>caplacizumab<br/>(N=77)</b> |
|-------------------------------|-------------------------------------------------------------------|
| <b>Adverse events</b>         | <b>28 (36%)</b>                                                   |
| <i>Bleeding events</i>        | <i>16 (21%)</i>                                                   |
| Gingivorrhagia                | 15 (19%)                                                          |
| Metrorrhagia                  | 8 (10%)                                                           |
| <i>Non-bleeding events</i>    | <i>15 (19%)</i>                                                   |
| Thrombocytosis                | 15 (19%)                                                          |
| <b>Serious adverse events</b> | <b>0 (0%)</b>                                                     |
| Deaths                        | <b>0 (0%)</b>                                                     |

iTTP: Immune Thrombotic Thrombocytopenic Purpura
